# Supplementary material
Source: publisher site journal article supplement (https://www.dovepress.com/article/356416)
Supplement: Supplementary file 1 [file get_supplementary_file.php]

**Supplemental Document 1.**

**AR-Impact Speaker Bureau Chronic Pain Survey**

**Q1 Have you ever treated a patient with failed back surgery syndrome/post laminectomy syndrome?**

Yes

No

**On a scale of 0 (no knowledge) to 100 (extensive knowledge) how would you rate your knowledge of the evidence for or against the following treatments for chronic pain syndromes (i.e. axial low back pain, chronic radicular pain, post laminectomy syndrome, complex regional pain syndrome, etc.)?**

**Q2 Acupuncture**

**Q3 Chiropractic Manipulation**

**Q4 Chronic Opioid Management**

**Q5 Epidural Steroid Injections**

**Q6 Gabapentinoids/Anti-Depressants**

**Q7 Neuromodulation/Spinal Cord Stimulation**

**Q8 Radiofrequency Ablation**

**Q9 Which of the follow therapies have you prescribed or referred a patient for who has chronic pain from failed back surgery syndrome/post laminectomy syndrome? (Please select all that apply)**

Acupuncture

Chiropractic Manipulation

Chronic Opioid Management

Epidural Steroid Injections

Gabapentinoids/Anti-Depressants

Neuromodulation/Spinal Cord Stimulation

Radiofrequency Ablation

None of the Above

**Q10 In the future, which of the follow therapies would you prescribe or refer a patient for who has chronic pain from failed back surgery syndrome/post laminectomy syndrome? (Please select all that apply)**

Acupuncture

Chiropractic Manipulation

Chronic Opioid Management

Epidural Steroid Injections

Gabapentinoids/Anti-Depressants

Neuromodulation/Spinal Cord Stimulation

Radiofrequency Ablation

None of the Above
